# Supplementary material for: Metabolic suppression identifies new antibacterial inhibitors under nutrient limitation
Source: Springer Nature journal article supplement (doi:10.1038/nchembio.1361), 2013-10-13
Supplement: 41589_2013_BFnchembio1361_MOESM23_ESM.mol [file 41589_2013_BFnchembio1361_MOESM23_ESM.mol]

  ChemDraw09231310422D

 13 13  0  0  0  0  0  0  0  0999 V2000
   -2.5017    0.0009    0.0000 C   0  0  0  0  0  0  0  0  0  0  0  0
   -2.5017   -0.8253    0.0000 C   0  0  0  0  0  0  0  0  0  0  0  0
   -1.7862   -1.2384    0.0000 C   0  0  0  0  0  0  0  0  0  0  0  0
   -1.0707   -0.8253    0.0000 C   0  0  0  0  0  0  0  0  0  0  0  0
   -1.0707    0.0009    0.0000 C   0  0  0  0  0  0  0  0  0  0  0  0
   -1.7862    0.4140    0.0000 C   0  0  0  0  0  0  0  0  0  0  0  0
   -0.3562   -1.2378    0.0000 C   0  0  0  0  0  0  0  0  0  0  0  0
   -0.3562    0.4134    0.0000 S   0  0  0  0  0  0  0  0  0  0  0  0
    0.3583    0.0009    0.0000 C   0  0  0  0  0  0  0  0  0  0  0  0
    1.0727    0.4134    0.0000 C   0  0  0  0  0  0  0  0  0  0  0  0
    1.7872    0.0009    0.0000 N   0  0  0  0  0  0  0  0  0  0  0  0
    2.5017    0.4134    0.0000 N   0  0  0  0  0  0  0  0  0  0  0  0
    1.0727    1.2384    0.0000 O   0  0  0  0  0  0  0  0  0  0  0  0
  1  2  2  0      
  2  3  1  0      
  3  4  2  0      
  4  5  1  0      
  5  6  2  0      
  6  1  1  0      
  4  7  1  0      
  5  8  1  0      
  8  9  1  0      
  9 10  1  0      
 10 11  1  0      
 11 12  1  0      
 10 13  2  0      
M  END
