# Supplementary material for: Metabolic suppression identifies new antibacterial inhibitors under nutrient limitation
Source: Springer Nature journal article supplement (doi:10.1038/nchembio.1361), 2013-10-13
Supplement: 41589_2013_BFnchembio1361_MOESM35_ESM.mol [file 41589_2013_BFnchembio1361_MOESM35_ESM.mol]

  ChemDraw09231310422D

 14 14  0  0  0  0  0  0  0  0999 V2000
   -2.1445    0.4131    0.0000 C   0  0  0  0  0  0  0  0  0  0  0  0
   -2.1445   -0.4131    0.0000 C   0  0  0  0  0  0  0  0  0  0  0  0
   -1.4289   -0.8262    0.0000 C   0  0  0  0  0  0  0  0  0  0  0  0
   -0.7134   -0.4131    0.0000 C   0  0  0  0  0  0  0  0  0  0  0  0
   -0.7134    0.4131    0.0000 C   0  0  0  0  0  0  0  0  0  0  0  0
   -1.4289    0.8262    0.0000 C   0  0  0  0  0  0  0  0  0  0  0  0
    0.0010   -0.8256    0.0000 N   0  3  0  0  0  0  0  0  0  0  0  0
    0.0010    0.8256    0.0000 S   0  0  0  0  0  0  0  0  0  0  0  0
    0.7155    0.4131    0.0000 C   0  0  0  0  0  0  0  0  0  0  0  0
    1.4300    0.8256    0.0000 C   0  0  0  0  0  0  0  0  0  0  0  0
    0.7155   -0.4131    0.0000 O   0  0  0  0  0  0  0  0  0  0  0  0
    0.0010   -1.6506    0.0000 O   0  5  0  0  0  0  0  0  0  0  0  0
    1.4300    1.6506    0.0000 O   0  0  0  0  0  0  0  0  0  0  0  0
    2.1445    0.4131    0.0000 O   0  0  0  0  0  0  0  0  0  0  0  0
  1  2  2  0      
  2  3  1  0      
  3  4  2  0      
  4  5  1  0      
  5  6  2  0      
  6  1  1  0      
  4  7  1  0      
  5  8  1  0      
  8  9  1  0      
  9 10  1  0      
  7 11  2  0      
  7 12  1  0      
 10 13  2  0      
 10 14  1  0      
M  CHG  2   7   1  12  -1
M  END
